# Supplementary material
Source: PubMed Central journal article supplement (PMC6547072)
Supplement: jamapediatr-173-534-s002.pdf [file jamapediatr-173-534-s002.pdf]

## Supplementary Online Content

Parker LA, Weaver M, Murgas Torrazza RJ, et al. Effect of gastric residual evaluation on enteral intake in extremely preterm infants: a randomized clinical trial. *JAMA Pediatr*. Published online April 29, 2019. doi:10.1001/jamapediatrics.2019.0800

**eFigure.** Product-limit Curves Comparing Gastric Residual and No Gastric Residual Groups

This supplementary material has been provided by the authors to give readers additional information about their work.

**Panel A. Product-Limit Failure Curves comparing treatment groups on days to 120ml/Kg full feeds**

With Number of Subjects at Risk and 95% Confidence Limits

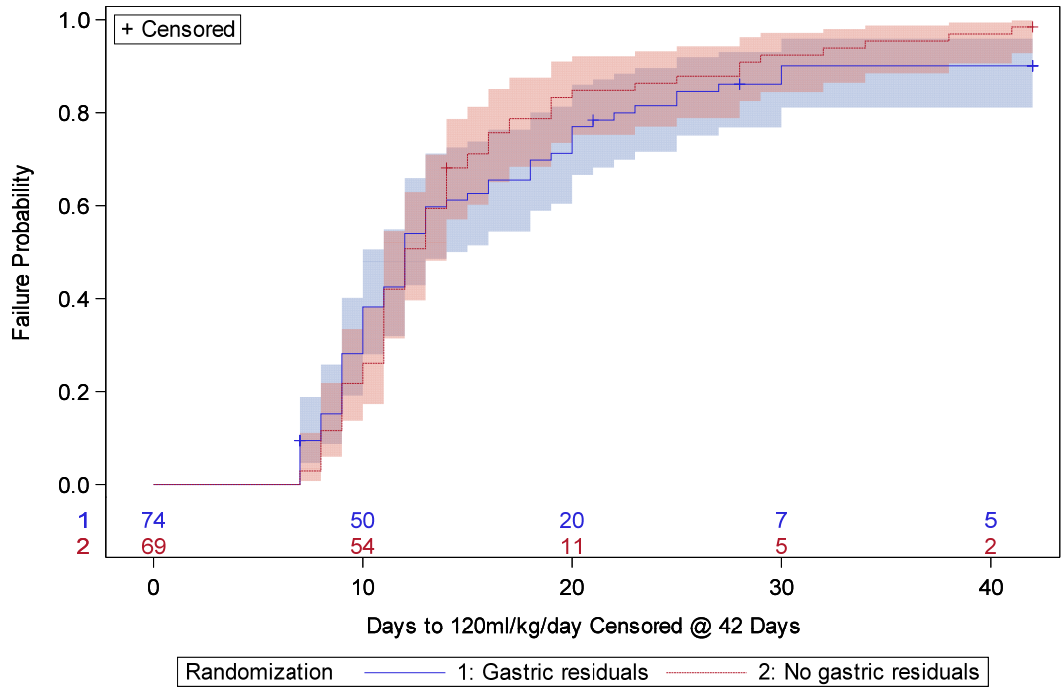

NOTES:

"Failure Probability" is probability of achieving 120mL/Kg full feed.  
 Test of equality over strata:  $-2\text{Log(LR)} \chi^2$  with 1 DF = 1.050,  $p = .306$ .

**Panel B. Product-Limit Failure Curves comparing treatment groups on hours receiving PN**

With Number of Subjects at Risk and 95% Confidence Limits

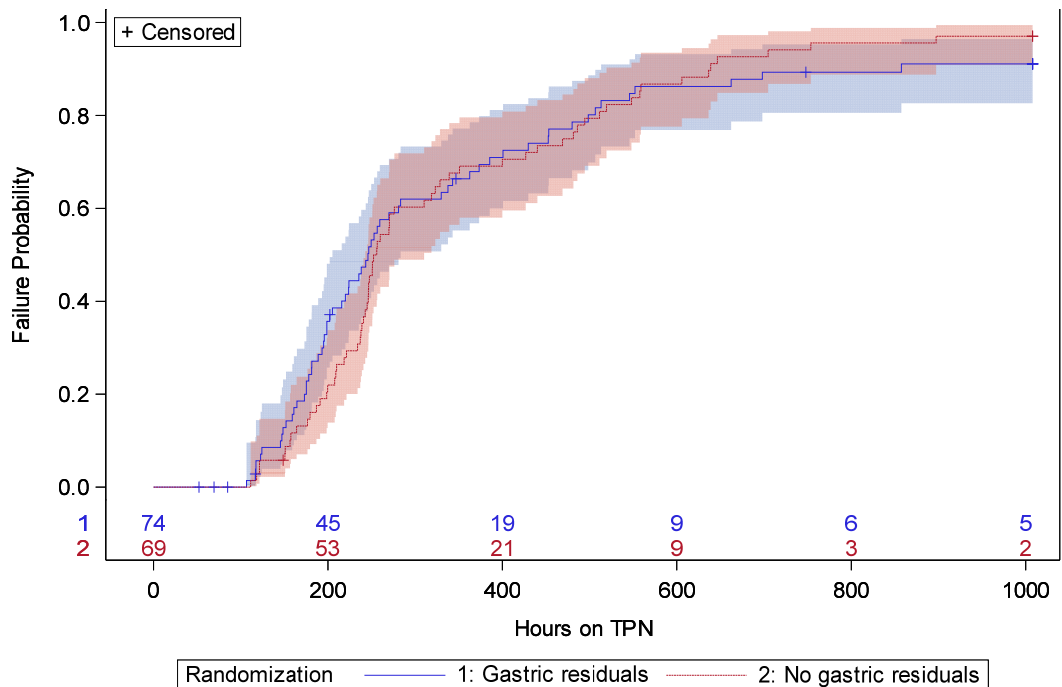

NOTES:

"Failure Probability" is probability of being removed from PN.

Test of equality over strata:  $-2\text{Log(LR)} \chi^2$  with 1 DF = .239, p = .625.

Panel C. Product-Limit Failure Curves comparing treatment groups on hours with CVL  
With Number of Subjects at Risk and 95% Confidence Limits

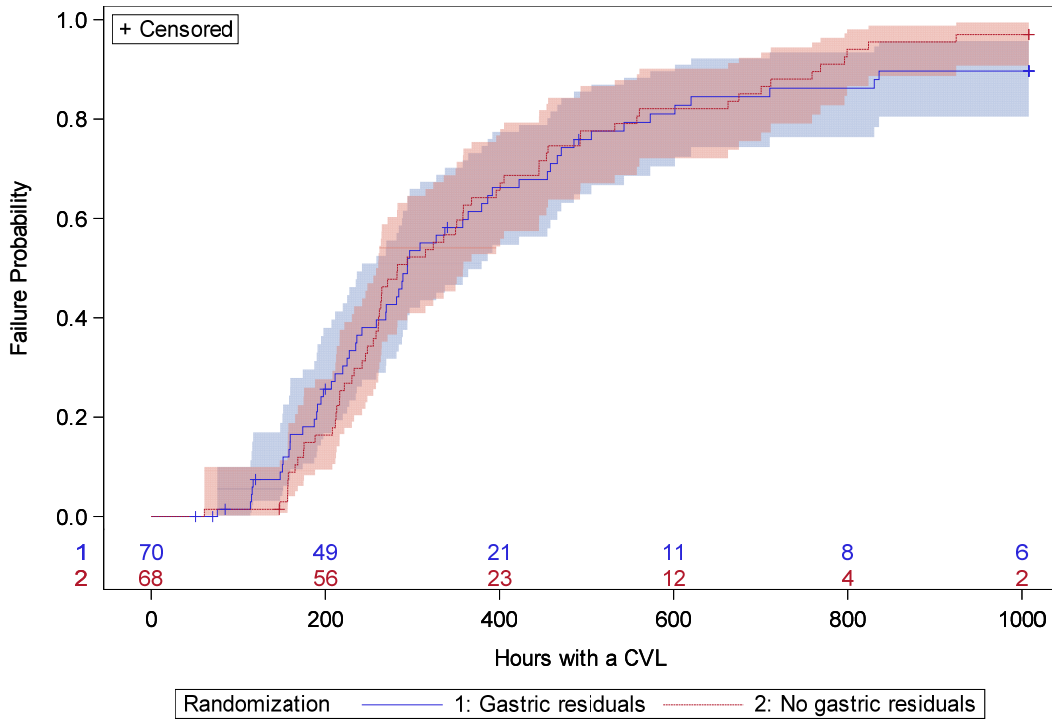

NOTES:

"Failure Probability" is probability of CVL being removed.

Test of equality over strata:  $-2\text{Log(LR)} \chi^2$  with 1 DF = .423, p = .515.

Panel D. Product-Limit Survival Estimates comparing treatment groups on days requiring invasive ventilator support  
With Number of Subjects at Risk and 95% Confidence Limits

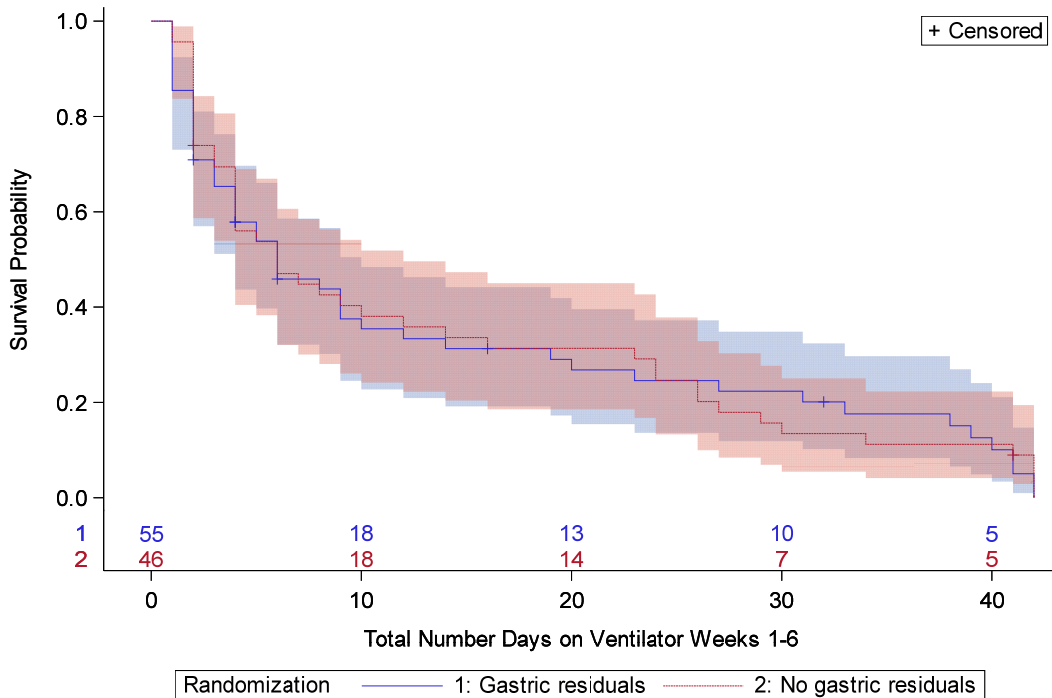

NOTES:

"Survival Probability" is probability of being on ventilator.  
 Test of equality over strata:  $-2\text{Log(LR)} \chi^2$  with 1 DF = .018,  $p = .892$ .

**Panel E. Product-Limit Failure Curves comparing treatment groups on days to discharge**  
 With Number of Subjects at Risk and 95% Confidence Limits

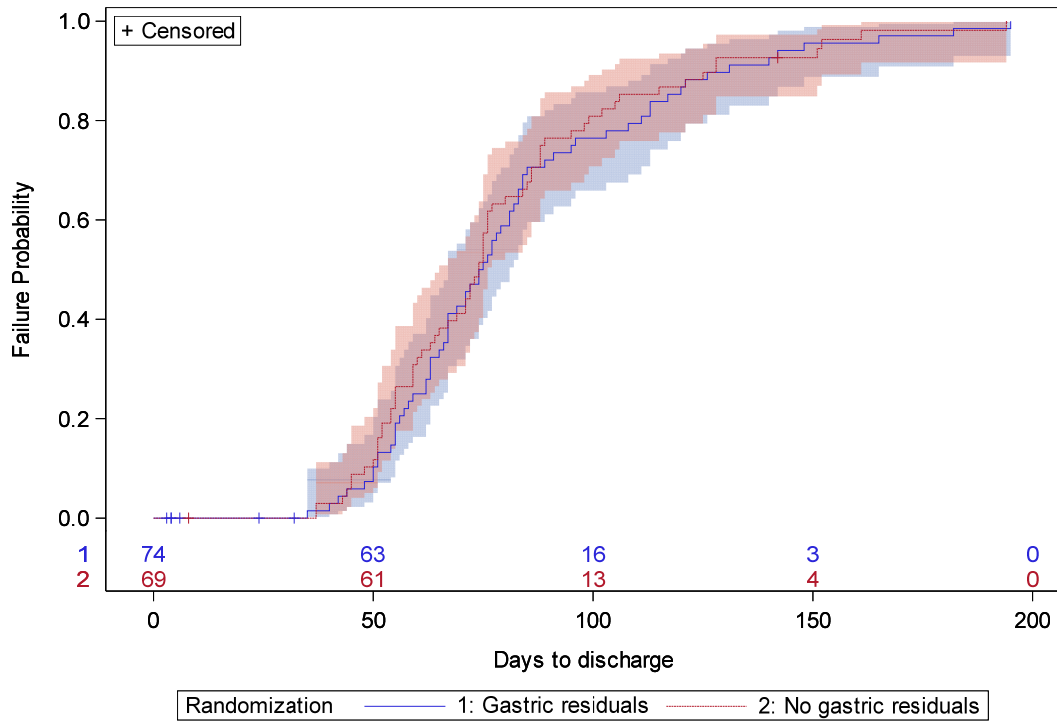

NOTES:  
 "Failure Probability" is probability of discharge.  
 Test of equality over strata:  $-2\text{Log(LR)} \chi^2$  with 1 DF = .045,  $p = .832$ .
