# Supplementary material
Source: PubMed Central journal article supplement (PMC6547072)
Supplement: jamapediatr-173-534-s003.pdf [file jamapediatr-173-534-s003.pdf]

## Data Sharing Statement

Parker. Effect of Gastric Residual Evaluation on Enteral Intake in Extremely Preterm Infants. *JAMA Pediatr*. Published April 29, 2019. 10.1001/jamapediatrics.2019.0800

### Data

**Data available:** No
